# Supplementary material
Source: Springer Nature journal article supplement (https://www.springermedizin.de/resource/supplementary/12889_2012_5125_MOESM2_ESM.pdf/9494688)

# Individual - based simulation model

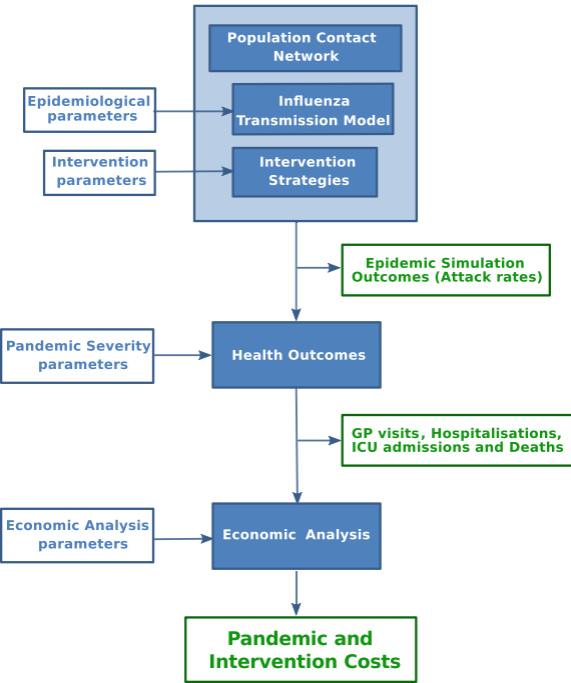

Supplement: MOESM2 [file 9494688]
